# Supplementary material for: Integrated Approaches to Reveal Genes Crucial for Tannin Degradation in Aureobasidium melanogenum T9
Source: MDPI journal article supplement (doi:10.3390/biom9090439), 2019-09-02
Supplement: s1 [file s1]

## Integrated approaches to reveal genes crucial for tannin degradation in *Aureobasidium melanogenum* T9

Lin-lin Zhang <sup>a, #</sup>, Jie Li <sup>b, #</sup>, Yi-Lin Wang <sup>c</sup>, Song Liu <sup>d</sup>, Zhi-Peng Wang <sup>e, \*</sup>, Xin-Jun Yu <sup>f</sup>

<sup>a</sup> College of Chemistry & Environmental Engineering, Shandong University of Science & Technology, Qingdao, 266510, China.

<sup>b</sup> Laboratory for Marine Fisheries and Aquaculture-Qingdao National Laboratory for Marine Science and Technology, Yellow Sea Fisheries Research Institute, Chinese Academy of Fishery Sciences, Qingdao 266071, China.

<sup>c</sup> College of Science, China University of Petroleum, Qingdao, 266580, China.

<sup>d</sup> Development & Reform Bureau, West Coast New Area, Qingdao 266000, China.

<sup>e</sup> Marine Science and Engineering College, Qingdao Agricultural University, Qingdao 266109, China.

<sup>f</sup> Key Laboratory of Bioorganic Synthesis of Zhejiang Province, College of Biotechnology and Bioengineering, Zhejiang University of Technology, Hangzhou, 310014, China.

\* Correspondence: [spirit87@163.com](mailto:spirit87@163.com)

# The authors contributed equally.

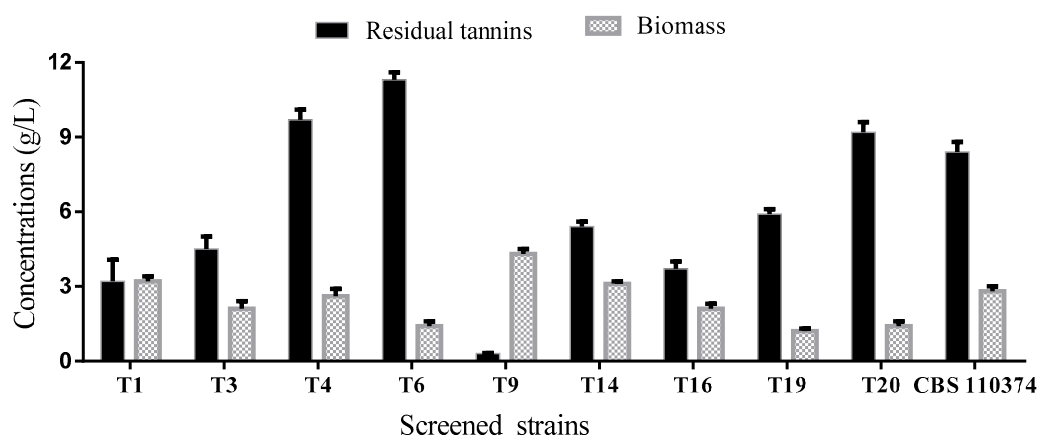

Fig.S1 Tannic acid degradation by different *Aureobasidium* spp. strains

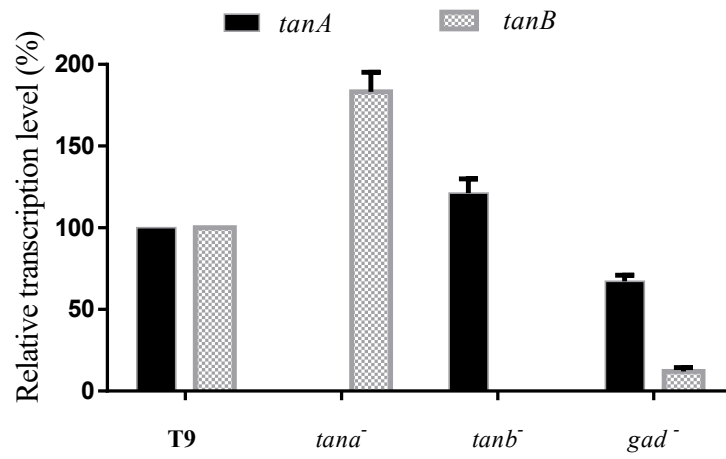

Fig. S2 Transcriptional level analysis of *tanA* and *tanB* genes in different strains
